## UV-B induced mortality and antioxidant enzyme activities in *Daphnia magna* at different oxygen concentrations and temperatures

Jan Borgeraas and Dag O. Hessen

University of Oslo, Department of Biology, PO Box 1027 Blindern, 0316 Oslo, Norway

**Abstract.** Survival of adult *Daphnia magna* was assessed after acute (<96 h) exposure to UV<sub>312</sub> under various temperatures (6, 12 and 18°C) or oxygen concentrations (5.6, 8.5 and 14.1 mg O<sub>2</sub> l<sup>-1</sup>) in the laboratory. The surviving animals were screened for the enzymes catalase (CAT) and glutathione transferase (GST), which may protect against UV-induced oxidative damage. In addition, the same two enzymes were assayed in separate experiments after acute exposure to UV<sub>312</sub> (6 h, 0.014 mW cm<sup>-2</sup>) and the different levels of temperature and oxygen. No differences were observed in either CAT or GST activity after exposure to the three levels of oxygen, but there was a tendency for decreasing specific activity with decreasing temperature for both enzymes. CAT activity was not influenced by UV radiation, whereas GST activity displayed a slight increase. Oxygen concentration did not influence survival during UV exposure but, contrary to expectations, survival tests at different temperatures clearly showed that reduced temperature increased survival. The results indicate that temperature effects must be considered when comparing dose effect relationships *in situ*, and suggest that low temperature is not a major cause of UV susceptibility in cold-adapted alpine and Arctic populations of *Daphnia*.

### Introduction

The potential detrimental effects of current levels of short-wavelength solar radiation on cladocera, and thus the need for protective mechanisms, have been known for a long time (Brehm, 1938; Merker, 1940), but the various means of UV protection in zooplankton is scarcely known. Studies mainly on mammalian cells suggest that UV induces cell damage by direct absorption by DNA/proteins, and by formation of reactive oxygen species (ROS) which are detected in both plant and animal cells after UV irradiation (Black, 1987; Masaki *et al.*, 1995; Hideg and Vass, 1996). Zooplankton may be exposed to ambient UV-induced ROS formed either in surface waters of lakes and ponds through UV absorption by dissolved organic carbon (Cooper *et al.*, 1994), or inside the organism's body by interaction between sensitive molecules (e.g. flavins, reduced pyridine nucleotides) and photons. Interaction between excited sensitizers and triplet oxygen produces active oxygen intermediates, such as <sup>1</sup>O<sub>2</sub>, H<sub>2</sub>O<sub>2</sub> or O<sub>2</sub>•, which in turn can lead to the production of an extremely reactive hydroxyl radical (•OH). Biological damage caused by ROS includes oxidation of membrane fatty acids, resulting in lipid peroxidation, oxidation of proteins and DNA damage (Fuchs and Packer, 1991).

Well known protective mechanisms against UV radiation in *Daphnia* include vertical migration, the ability to repair damage by photoreactivation mechanisms, and the presence of protective pigments such as carotenoids and melanin (Siebeck, 1978; Hebert and Emery, 1990; Hessen and Sørensen, 1990; Hobæk and Wolf, 1991; Siebeck and Böhm, 1991; Hessen, 1994). Another possible mechanism of protection is the production of various antioxidants. For detoxification and

removal of ROS, every organism has evolved a complex defence system consisting of both low weight antioxidants (ascorbate, glutathione and tocopherol) and antioxidant enzymes (e.g. catalase and glutathione transferase). Catalase (CAT) catalyses the degradation of  $H_2O_2$  into water and oxygen and therefore might offer protection against the deleterious effects of  $H_2O_2$  which may be generated in the photooxidation reactions occurring during UV exposure. Glutathione transferase (GST) catalyses the conjugation of glutathione with various electrophilic substrates, and plays a role in preventing oxygen toxicity due to their activity towards organic hydroperoxides and hydroxyalkenals, products of oxidative stress (Ålin *et al.*, 1985; Ketterer and Meyer, 1989). Both enzymes have been reported to be induced by  $H_2O_2$  in various organisms (Morichetti *et al.*, 1989; Rushmore *et al.*, 1991; Wang and Schellhorn, 1995; Buchner *et al.*, 1996) and are connected with increased resistance against UV radiation in bacteria and mammalian cells (Wang and Schellhorn, 1995; Bertling *et al.*, 1996; Kerb *et al.*, 1997). Except for studies in fish, very little is known about antioxidant protection in freshwater animals, and still less is known for zooplankton.

Temperature and oxygen concentration may both be major determinants of productivity and community structure in aquatic systems. Both parameters undergo long-term seasonal cycles in temperate lakes. In productive systems, oxygen concentration may also show pronounced diurnal fluctuations related to photosynthesis and respiration. *Daphnia* spp. inhabit a variety of freshwater habitats, ranging from deep lakes to highly UV-exposed localities such as coastal rock pools and alpine and Arctic ponds. These animals have to cope with changing and often extremely variable levels of UV radiation, temperature and oxygen. Both temperature and oxygen concentration would be expected to modify the effects of UV radiation of aquatic biota.

Studies on phototrophic organisms show that UV effects may be a balance between photochemical damage and biosynthetic repair. This balance would shift increasingly towards damage with decreasing temperature (Roos and Vincent, 1998). The most harmful effects of UV-B are not temperature-dependent, whereas both DNA repair and ROS detoxification, as well as excretory processes, are kinetic mechanisms which would be assumed to decrease in cold environments in poikilotherms (Hessen, 1996). Thus, if UV susceptibility increased with decreasing temperature, this could explain the apparently extensive need for photo-protection in alpine and Arctic *Daphnia* (Hebert and Emery, 1990; Hessen, 1996).

Ambient oxygen concentrations could influence UV-induced mortality in at least two ways. The first proposed mechanism of UV-induced mortality involves the interaction between a UV-induced excited chromophore inside the animal body and oxygen, resulting in internal ROS stress. If UV mortality is a process depending at least partially on oxygen, we would expect animals to be more sensitive to UV radiation at high oxygen concentrations. Many effects of UV radiation have been shown to be strongly dependent on oxygen (Graetzer, 1987; Andley and Clark, 1989). Secondly, the oxygen level itself may induce ROS production inside the animals (Jones, 1985) and thus, the protective mechanisms could be more easily overwhelmed. Both mechanisms are, however, dependent on a rise in internal oxygen tension during water oxygenation.

There is a general lack of data on antioxidants in zooplankton and therefore, this study aimed to provide some basic information. As oxidative stress should be reflected in antioxidant activity, we attempted, for the first time in *Daphnia*, to focus on antioxidant enzymes in relation to UV exposure. As a first step in this process, we assessed to what extent activities of CAT and GST in *D.magna* are influenced by UV radiation, temperature and oxygen concentration.

## Method

### *Animals*

The animals used in this study were a clone of *Daphnia magna* continuously maintained in our laboratory for several years. Animals were cultured in Elenedt M7 medium (OECD, 1996) at 18°C and fed daily with the green alga, *Selenastrum capricornutum*.

### *Temperature experiment*

The effects of temperature on UV-induced mortality and antioxidant enzymes were investigated in two experiments using two different temperature-regulated rooms. In both experiments, three temperatures were used (6, 12 and 18°C) and a 15 W Vilber-Lourmat lamp, with peak intensity at 312 nm (range 280–380 nm), was used as UV-B source. According to the manufacturer, no UV-C was emitted by the lamp and hence, we did not apply any UV-C cut-off filters. Also, a spectral (minor) tail in UV-C would eventually be screened off by the water surface film. In all experiments, blue-white light was provided in a 10:14 h light dark (LD) cycle to allow for photo-repair. In the first experiments (Exp. I), MBID400 400W metal halide lamps (GE Lighting) at integrated PAR intensities approaching daylight were used, while standard cool-white fluorescent tubes at far lower intensities ( $<50 \mu\text{E m}^{-2} \text{s}^{-1}$ ) were used in the second experiments (Exp. II). The spectral distribution of the UV-B source and the visible light used in the two experiments are given in Figure 1. The survival tests were performed in six replicate 40 ml beakers (3 cm depth), each with five adult individuals, with a 10 h irradiation regime. Animals were exposed to two UV light intensities, 0.025 and 0.005  $\text{mW cm}^{-2}$  (Exp. I) or 0.042 and 0.014  $\text{mW cm}^{-2}$  (Exp. II), obtained by regulating the distance from the UV source. The doses were assessed using a Vilber-Lourmat VLX-3W radiometer, with peak sensitivity at 312 nm but integrating over the entire range emitted by the lamp. The area covered by the six beakers was sufficiently small to allow for homogenous light intensities for all beakers. Animals exposed to visible light only served as controls. In each of the two experiments, the animals were acclimated to the temperature for 72 h (Exp. I) or 48 h (Exp. II) before the first UV exposure. Food levels were kept low ( $<5 \mu\text{g Chl a l}^{-1}$ ) during the experiment to minimize chlorophyll absorbance of UV-B. The number of live animals was counted twice per day and the experiments were terminated after 96 h (Exp. I) or 72 h (Exp. II), when surviving animals were frozen with liquid nitrogen for later examination of antioxidants.

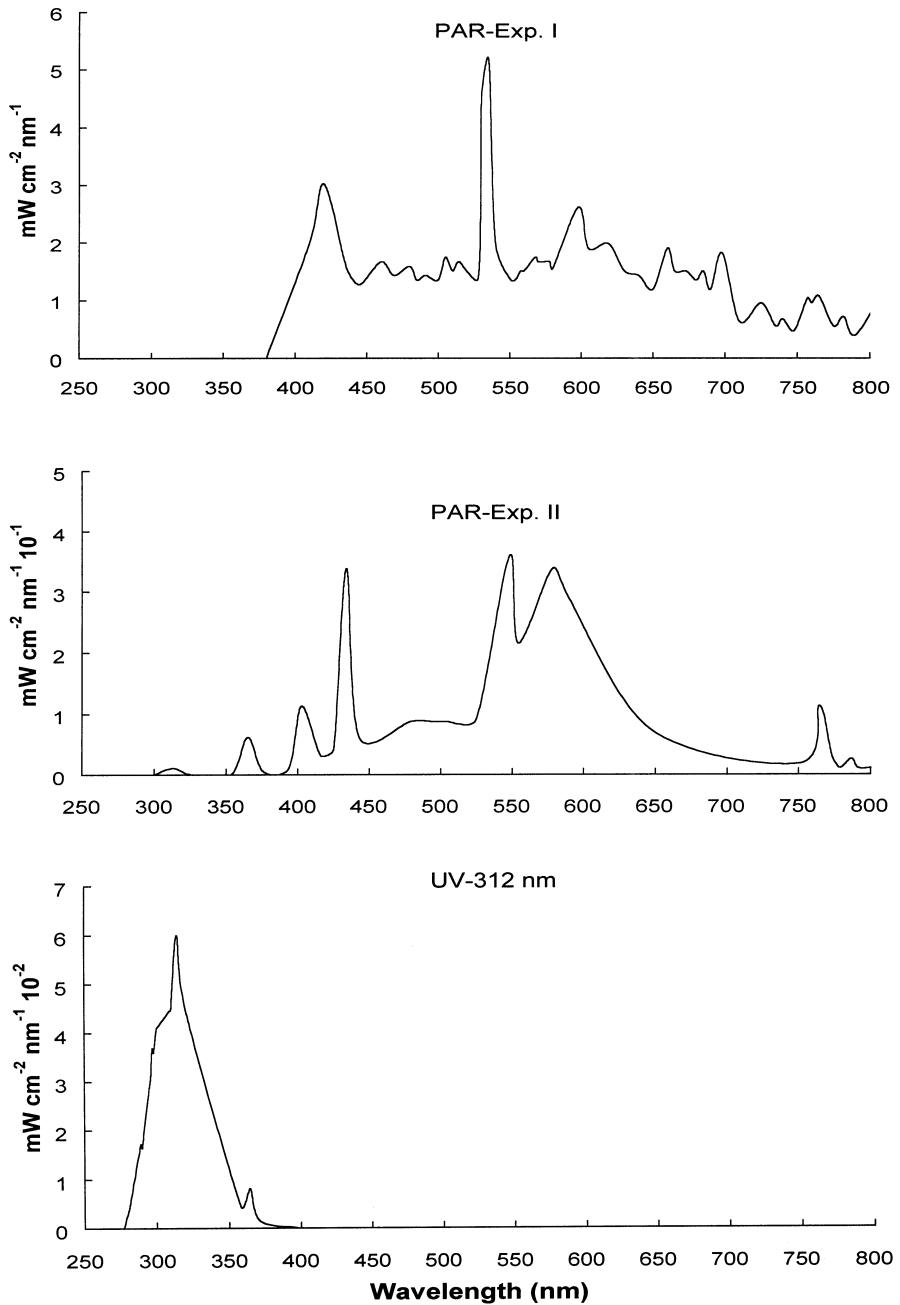

**Fig. 1.** Spectral distribution for the three light sources used in the experiments. **Upper:** MBID400 400W metal halide lamp. **Middle:** cool white fluorescent tubes. **Lower:** 15 W Vilber-Lourmat UV-B lamp.

*Acute effects of single dose UV-B radiation on antioxidant enzymes*

In order to assess the influence of a single dose of UV-B radiation on antioxidant enzymes, 240 adult animals were exposed for 6 h at an intensity of  $0.014 \text{ mW cm}^{-2}$ . A further 240 animals served as non-irradiated controls. The experiment was conducted at  $18^\circ\text{C}$  with continuous blue-white light as in Exp. II. The animals were exposed in 40 ml beakers (3 cm depth) containing five individuals as in the temperature experiment. Sub-samples of 80 animals ( $4 \times 20$ ) were obtained at 0, 6, 14 and 30 h after the onset of irradiation and frozen with liquid nitrogen for enzyme analysis.

*Oxygen experiment*

The oxygen experiments were performed at  $18^\circ\text{C}$  and with continuous cool-white light ( $\sim 50 \mu\text{E m}^{-2} \text{ s}^{-1}$ ) to promote photorepair. The animals were exposed in an insulated flow-through apparatus consisting of one gas equilibration tank and two exposure chambers connected in series. The equilibration tank was filled with M7-media and oxygen concentration was maintained by bubbling in gas mixtures of 10:90%  $\text{O}_2:\text{N}_2$  to lower, or 40:60%  $\text{O}_2:\text{N}_2$  to increase the oxygen level, respectively. Medium from the equilibration tank was transferred to the two exposure chambers at a rate of  $1 \text{ ml min}^{-1}$  and then back into the equilibration tank by means of peristaltic pumps. The exposure chambers consisted of either 150 ml quartz bottles (survival tests under UV radiation) or 250 ml glass bottles (antioxidant tests under varying  $\text{O}_2$ , without UV). Animals were exposed to three levels of oxygen (5.6, 8.5 and  $14.1 \text{ mg O}_2 \text{ l}^{-1}$ ) as measured in the exposure bottles using Winkler titration. The animals were fed immediately before, but not during, the exposure period. The survival tests were performed with 10 adult individuals and repeated 4–8 times. After an initial 16 h acclimation to the oxygen tension, the animals were exposed to  $4 \text{ h day}^{-1}$  of  $\text{UV}_{312}$  radiation at an intensity of  $0.013 \text{ mW cm}^{-2}$ , and mortality was recorded three times daily during the 96 h test period. The second exposure bottle (coupled in series) was shielded from the UV radiation and served as control. The animals in the control were thus not directly exposed to UV, but they received radiated water from the first, non-shielded exposure bottle. This meant that most of the short-lived free radicals would not be present in this second chamber, whereas more long-lived photoproducts, such as  $\text{H}_2\text{O}_2$ ,  $\text{CO}_2$ , CO and free metals, would be. In order to assess the influence of oxygen concentration on levels of antioxidant enzymes, 15 adult individuals were exposed for 48 h using the same three oxygen levels but without UV radiation. For all three oxygen concentrations, the treatment was performed in duplicate and repeated 2–4 times.

*Enzyme activities*

Animals were immediately frozen with liquid nitrogen at the end of experiments and kept in a freezer ( $-80^\circ\text{C}$ ) for enzyme assays. Using a glass-Teflon Potter-Elvehjem homogenizer, 10–20 animals were homogenized in  $900 \mu\text{l}$  ice-cold

50 mM potassium phosphate buffer, pH 7.7, containing 1 mM EDTA and 0.1% Triton X-100. Supernatant fluids (1000 g for 20 min at 4°C) of homogenates were used directly as enzyme sources. CAT activity was basically determined as described by Claiborne (Claiborne, 1985) using 20 mM H<sub>2</sub>O<sub>2</sub> as substrate. One unit (U) is defined as  $\mu\text{mol H}_2\text{O}_2$  decomposed  $\text{min}^{-1}$ , at pH 7.0 and 30°C. GST activity towards 1-chloro-2,4-dinitrobenzene (CDNB) was measured as described by Habig *et al.* (Habig *et al.*, 1974), at pH 6.5, in a thermostatically-controlled (30°C) Beckman DU 62-spectrophotometer. One unit is defined as nmol CDNB conjugated  $\text{min}^{-1}$ . Protein concentrations were determined according to Bradford (Bradford, 1976) using dye reagent from Bio-Rad and with bovine serum albumin as standard.

### *Statistics*

Differences in survival were analysed using the log-rank test. Enzyme activity data were analysed using one-way ANOVA followed by the Tukey-Kramer multiple comparison test.

## **Results**

### *Temperature experiment*

Exp. I clearly demonstrated the effect of temperature on UV-induced mortality (Figure 2). At 18°C, death began to occur within 48 h and all individuals were dead after 96 h. No deaths were observed in the control group. The response to the two applied intensities (0.005 and 0.025  $\text{mW cm}^{-2}$ ) was not significantly different as judged by the log-rank test at the highest temperature. On the other hand, at 12°C, the percentage survival after 96 h was 87, 57 and 3% at intensities of 0, 0.005 and 0.025  $\text{mW cm}^{-2}$ , respectively. The survival tests conducted at 12°C thus yielded highly significant (log-rank test,  $P < 0.01$ ) differences with respect to UV intensity, whereas at 6°C, none of the survival curves were significantly different from the control (no UV). The percentage survival after 96 h was 80, 73, and 57% at 0, 0.005 and 0.025  $\text{mW cm}^{-2}$ , respectively. In order to assess the effect of temperature on expression of antioxidant enzymes during UV exposure, surviving animals were assayed for catalase and glutathione transferase. Without UV exposure, both enzymes showed a weak tendency for decreasing specific activity with decreasing temperature (Figures 3 and 4), but the differences were not significant. There were insufficient numbers of survivors to test for all groups at 18 and 12°C but at 6°C, CAT activity was not significantly changed by UV exposure for 96 h. GST activity showed a trend for increasing specific activity with increasing UV intensity at 6°C, but differences were not significant. Two problems arose during the performance of Exp. I. First, the temperature in the climate room varied diurnally (owing to heat emitted from the lamps) within the following ranges:  $18 \pm 3$ ,  $12 \pm 2$  and  $6 \pm 4$ °C. In addition, the survival tests indicated that the high intensity of the PAR light itself was having a negative impact on the animals, with the greatest effect at the lower temperatures (controls, Figure 2). In order to verify this, animals ( $5 \times 3$ ) were exposed at 12°C either to the full

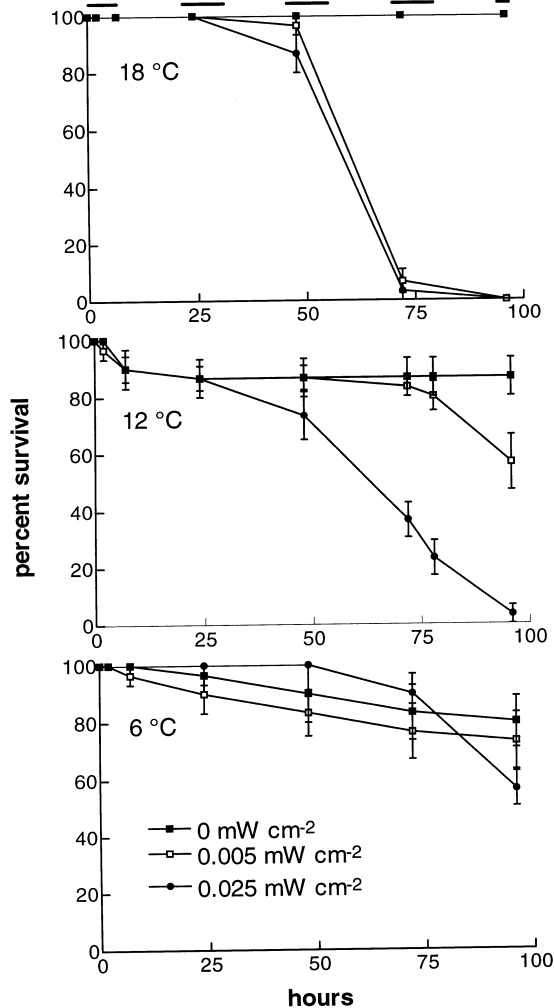

**Fig. 2.** Survival of *Daphnia magna* exposed to two levels of UV<sub>312</sub> at 6, 12 and 18°C (Exp. I). Horizontal lines indicate UV exposure times (10 h day<sup>-1</sup>). Average and SEM of six replicates.

PAR condition, or to a reduced light regime achieved by covering the beakers with a semi-transparent box. The animals given the full light treatment started to succumb from day 2 onwards and after 4 days, 13% of the animals were dead, whereas all animals receiving the reduced light treatment were alive at the end of the experiment. Therefore, a second series of experiments (Exp. II) was conducted in another climate room with stable temperature and a reduced level of PAR radiation (Figure 1). In Exp. II, no deaths were observed in the controls for 72 h, and the results confirmed the conclusions from Exp. I that reduced temperature increased survival. At the highest UV doses (0.042 mW cm<sup>-2</sup>), death

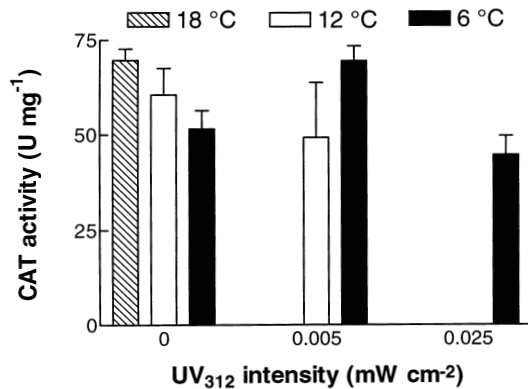

**Fig. 3.** Levels of catalase (U mg<sup>-1</sup> protein) in surviving *Daphnia magna* after exposure at 6, 12 and 18°C to three levels of UV radiation for 96 h. Values are means ± SEM (n = 3).

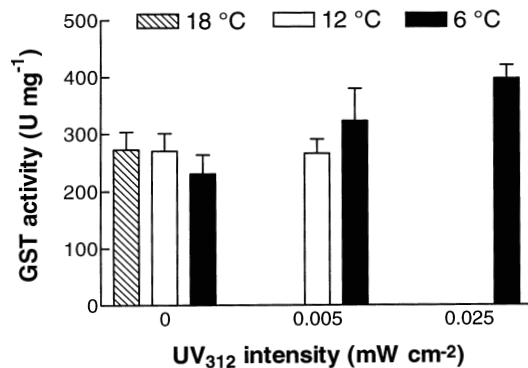

**Fig. 4.** Levels of glutathione transferase (U mg<sup>-1</sup> protein) in surviving *Daphnia magna* after exposure at 6, 12 and 18°C to three levels of UV radiation for 96 h. Values are means ± SEM (n = 3).

began to occur within 32 h at 18°C whereas at 6°C, death was not observed until 54 h after the first irradiation (Figure 5). Percentage survival after 48 h was 17, 73 and 100 at 18, 12 and 6°C, respectively. At the lower dose (0.014 mW cm<sup>-2</sup>), no deaths had occurred at 6°C after 72 h, whereas all animals were dead at 18°C. At both intensities, the effect of temperature was significant as judged by the log-rank test ( $P \leq 0.03$ ). As in Exp. I, the results indicated a tendency towards decreasing specific activity with decreasing temperature for both enzymes (Figure 6). Moreover, specific activity of both enzymes was significantly ( $P < 0.01$ ) decreased, in comparison with the 18°C control, at 120 h (acclimation plus exposure) of incubation at 6°C. Only animals incubated at 6°C survived in sufficient quantities to perform enzyme assays. GST activity was significantly ( $P < 0.05$ )



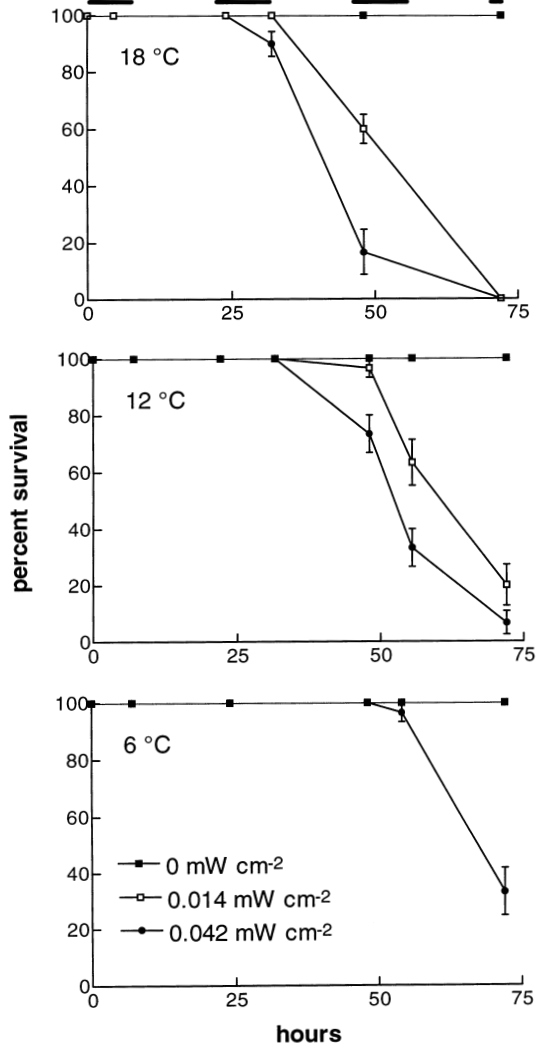

**Fig. 5.** Survival of *Daphnia magna* exposed to two levels of UV<sub>312</sub> at 6, 12 and 18°C (Exp. II). Horizontal lines indicate UV exposure times (10 h day<sup>-1</sup>). Average and SEM of six replicates.

increased in surviving animals exposed to UV intensity of 0.014 mW cm<sup>-2</sup> compared with non-irradiated controls, whereas no significant differences were seen in CAT activity (Figure 7).

#### *Acute effects of single dose UV-B radiation on antioxidant enzymes*

Acute UV exposure at an intensity of 0.014 mW cm<sup>-2</sup> for 6 h produced no changes in specific activity of CAT at any time following the treatment (Figure 8). GST

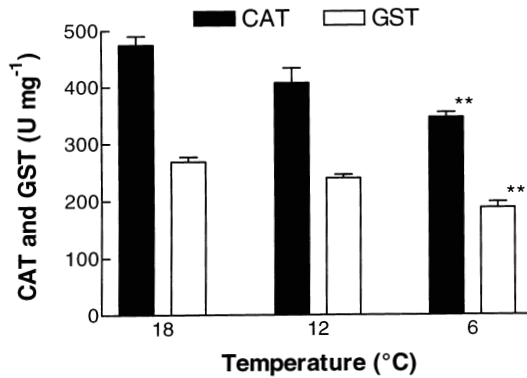

**Fig. 6.** Specific activity (U mg<sup>-1</sup> protein) of catalase (CAT) and glutathione transferase (GST) from *Daphnia magna* exposed to 6, 12 and 18°C for 120 h. Values are means ± SEM ( $n = 3$ ). \*\* $P \leq 0.01$  significant difference to animals exposed to 18°C.

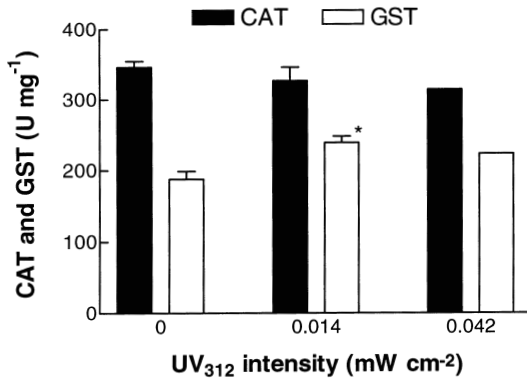

**Fig. 7.** Levels of catalase and glutathione transferase (U mg<sup>-1</sup> protein) in surviving *Daphnia magna* after exposure at 6°C to three levels of UV radiation for 72 h. Average ± SEM of one to three replicates. \* $P \leq 0.05$  significant difference to non-irradiated animals.

activity was significantly ( $P < 0.01$ ) elevated 24 h post-irradiation compared with the control group. Additionally, there was an unexplained reduction of GST in both the exposed group and the control immediately after exposure, perhaps because of manipulation of the animals.

### Oxygen experiment

The survival tests using different oxygen concentrations in water produced an identical pattern for all three concentrations. Using 4 h UV exposure per day, death began to occur from 44 h onwards and after 88 h, all individuals from all concentrations were dead (Figure 9). No death was observed in controls, i.e., in individuals receiving irradiated water without being directly exposed to UV. This

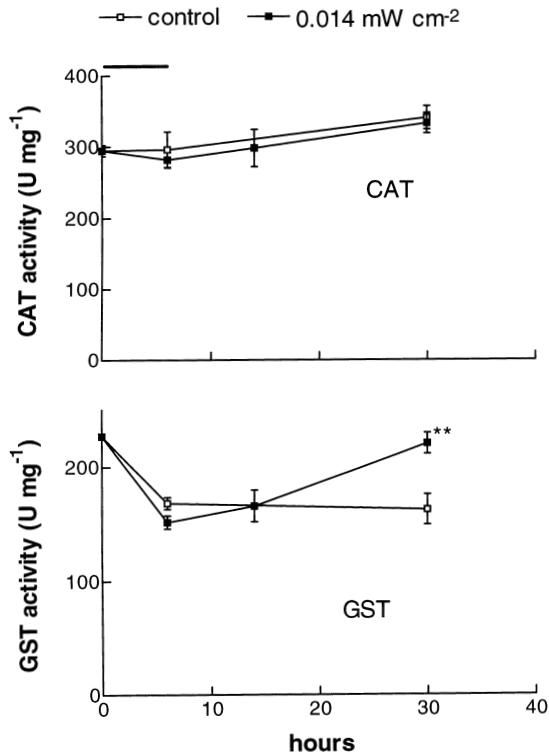

**Fig 8.** Specific activity ( $\text{U mg}^{-1}$  protein) of catalase (CAT) and glutathione transferase (GST) from *Daphnia magna* after exposure to  $0.014 \text{ mW cm}^{-2}$  UV<sub>312</sub> at  $18^\circ\text{C}$  for 6 h (horizontal line). Values are means  $\pm$  SEM ( $n = 4$ ). \*\* $P \leq 0.01$  significant difference to control.

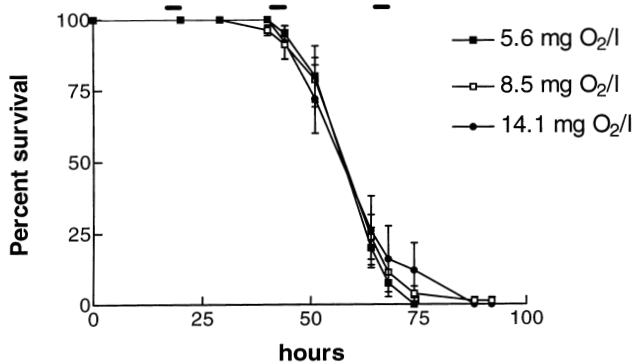

**Fig 9.** Percentage survival of *Daphnia magna* exposed to three periods of 4 h (marked as horizontal lines) of UV<sub>312</sub> at an intensity of  $0.013 \text{ mW cm}^{-2}$  and three levels of oxygen concentration in water. Average and SEM of four to eight replicates.

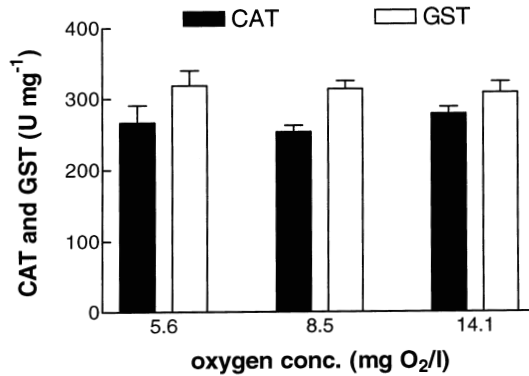

**Fig. 10.** Specific activity (U mg<sup>-1</sup> protein) of catalase (CAT) and glutathione transferase (GST) from *Daphnia magna* exposed to three levels of oxygen concentration for 48 h. Values are means  $\pm$  SEM ( $n = 4-8$ ).

indicates non-lethality of the oxygen concentrations used and no indirect effect of UV-irradiated circulatory water. It should be remembered, however, that most free radicals and other photoproducts are extremely short-lived and would probably be largely eliminated before entering the control chamber. No differences were observed in CAT or GST activity after exposure for 48 h to the three levels of oxygen (Figure 10).

### Discussion

To our knowledge, there is no information on the effects of temperature on UV-induced mortality in Cladocera. The present study indicates that low temperatures reduce sensitivity to acute exposure to UV-B radiation. Hairston found similar effects when studying copepods exposed to blue light (Hairston, 1979). This was somewhat surprising as the *a priori* assumption would be that direct UV-induced lesions would be temperature-independent, whereas the repair mechanisms should slow down at low temperatures. However, interactions involving temperature are complex because they affect the general metabolism of poikilotherms. Generally, reduced temperature leads to increased life span, generation time and body size, and decreased oxygen consumption, metabolic activity, heart rate, respiration rate, filtering rate and growth rate (MacArthur and Baillie, 1929; Goss and Bunting, 1980; Korpelainen, 1986; McKee, 1995; Paul *et al.*, 1997). Most studies have shown that sensitivity of aquatic invertebrates to various toxic compounds increases with temperature (Persoone *et al.*, 1989; Møller *et al.*, 1994). Moreover, in aquatic organisms, toxic materials may be more toxic at higher temperatures when exposure time is short but with increased exposure time, the temperature effect on toxicity is gradually reduced (Schaefer and Pipes, 1973; Sprague, 1985). However, unlike UV radiation, temperature affects toxicity to chemicals because animals exposed at low temperature will take up less toxicant than those exposed at high temperature.

Low temperature may, however, slow down UV-induced mortality in several ways. First, even though the initial UV damage is temperature-independent, UV-induced mortality probably proceeds through a complex series of individual reactions that may be temperature-dependent. Secondly, not only are repair and detoxification processes slowed down at low temperatures, but also activation processes such as ROS metabolism and lipid peroxidation. Thirdly, low temperature may change the physiological state of the animal. It is possible that animals are able to acclimate to low temperatures by increasing their metabolic efficiency in order to achieve homeostatic control over enzyme reactions. The animals may respond by increased efficiency of damage repair or increased production of antioxidants.

Both temperature experiments showed a decrease in specific activities of GST and CAT with decreasing temperatures. This may indicate that the animals experience reduced ROS stress at lower temperatures and therefore respond by reducing synthesis of the enzymes. Lower temperature leads to reduced oxygen consumption and will entail reduced rates of normal ROS production, thus reducing the risk of oxidative damage. Moreover, the reduced activities indicate that these enzymes are not involved in the higher UV tolerance observed at low temperatures. However, the interpretation is not straightforward because all the activities were assayed at 30°C and not at the incubation temperature. Therefore, the standard activities given here represent the amount of catalytically-active enzyme per unit protein. However, the real activities (the true rates of antioxidant enzymes under specific temperatures) depend on the body temperature and generally decrease with decreasing temperature. Accordingly, measurements at 30°C will overestimate the real activity in animals experiencing low temperatures, although mammalian catalases are relatively temperature-insensitive (Aebi, 1984). The animals were apparently not acclimating to the colder environment by producing more CAT and GST, but we cannot rule out the possibility that during thermal acclimation, other forms of the enzymes were produced. Temperature-insensitive forms of CAT were observed in poikilotherm animals living in, or adapted to a cold environment (Gil and Barja de Quiroga, 1988; Regoli *et al.*, 1997). The present study was performed by lowering the temperature for a warm-adapted *Daphnia* species (*D. magna*), and different results may have been experienced by increasing the temperature in cold-adapted species (Arctic *D. pulex* or alpine *D. longispina*).

The effects of UV on antioxidant enzymes have been almost exclusively investigated in bacteria, plants and mammalian skin. Acute exposure to UV leads to reduction in several antioxidants, including CAT activity in mammalian cells immediately after irradiation (Fuchs *et al.*, 1989; Shindo *et al.*, 1994). Several studies have indicated that CAT is destroyed both through direct absorbance of light and by the ROS created as a result of the UV radiation (Shindo *et al.*, 1994; Shindo and Hashimoto, 1995; Zigman *et al.*, 1996). Few studies have investigated the effect of UV radiation on GST, but this enzyme system is linked with protection against UV radiation-induced cutaneous damage in humans (Kerb *et al.*, 1997). Punnonen *et al.* found a weak but insignificant increase in GST after chronic exposure to UV-B in human epidermis (Punnonen *et al.*, 1995), whereas Nakano

*et al.* observed a decrease in GST mRNA levels by UV irradiation in rat keratinocytes (Nakano *et al.*, 1997). In the present study, we measured CAT and GST in daphnids repeatedly exposed to UV for 96 h (Exp. I) or 72 h (Exp. II). We found no reduction in CAT activity, as observed in mammalian cells, after acute exposure, indicating that CAT is not destroyed by UV radiation in daphnids. Moreover, the results did not indicate that CAT was protecting the surviving animals against the effects of radiation. However, the results must be interpreted with caution because the doses were high and only the surviving animals were assayed. The results also indicated a dose-dependent increase in GST activity. Exposure to a single sub-lethal dose produced the same type of response: no effect on CAT activity but an increase in GST activity (Figure 8). It could be hypothesized that the need for detoxification of the toxic products of peroxidation processes induces GST, but the results are too preliminary to be conclusive.

Very little information is currently available concerning ROS and environmental oxygen concentration in aquatic invertebrates. Most originates from marine studies of anoxia-tolerant polychaeta, bivalves and gastropods (Abele-Oeschger and Oeschger, 1995; Abele *et al.*, 1998; Pannunzio and Storey, 1998). Broadly speaking, because the rate of ROS production in animals is proportional to the rate of oxygen consumption (Barthelemy *et al.*, 1981), an increase in ROS production and activity of antioxidant enzymes could be expected during hyperoxia, and the opposite situation during hypoxia. This is confirmed in several studies on vertebrate species, including fish (Radi *et al.*, 1988) and amphibian tadpoles (Gil *et al.*, 1987).

In the present study, we exposed the animals to dissolved oxygen concentrations ranging from moderate hypoxia (5.6 mg O<sub>2</sub> l<sup>-1</sup>, 59% saturation) to moderate hyperoxia (14.1 mg O<sub>2</sub> l<sup>-1</sup>, 149% saturation). These concentrations are not extreme. Jones, for example, measured a diurnal variation between 0.6 and 24 mg O<sub>2</sub> l<sup>-1</sup> in a small pond (Jones, 1961). However, oxygen concentration did not have any effect on UV-induced mortality in our study. The explanation for this may be that *Daphnia* species are able to regulate their oxygen consumption and thus, prevent changes in their internal oxygen concentration. *Daphnia magna* shows a high degree of respiratory independence at declining oxygen concentrations and is able to maintain the rate of oxygen consumption, independent of the ambient oxygen concentration, down to a critical concentration of about 1 mg l<sup>-1</sup> (Kobayashi and Hoshi, 1984). Unlike many other water breathers, oxyregulation in *D.magna* at hypoxia is not controlled by changes in ventilation but rather, by an increase in heart rate (Paul *et al.*, 1997) and by producing multiform haemoglobin, thus improving their ability to extract oxygen molecules from the water (Kobayashi *et al.*, 1988; Kobayashi and Tanaka, 1991). In contrast to hypoxia, few studies have examined the physiological effects of hyperoxia on *Daphnia*. However, most studies on other crustaceans show that oxygen consumption is independent of oxygenation at far higher concentrations than those used in the present study (Sinha and Dejours, 1980; Morris and Taylor, 1985). Moreover, Paul *et al.* found a decrease in heart rate during hyperoxia in *D.magna* (Paul *et al.*, 1997). Apparently, the oxygen concentrations used in the present study were unable to raise the internal concentration of oxygen in the animals to a level

where increased UV-induced mortality could be observed. This was supported by the fact that CAT and GST activities were not affected by the concentrations used. Oxygen concentration could, however, exert a potential effect using a wider oxygen range than that used in this study.

## Acknowledgements

This research was supported by the Norwegian Research Council (NFR), grant no. 101536/720, to D.O.Hessen.

## References

- Abele,D., Großpietsch,H. and Pörtner,H.O. (1998) Temporal fluctuations and spatial gradients of environmental PO<sub>2</sub>, temperature, H<sub>2</sub>O<sub>2</sub> and H<sub>2</sub>S in its intertidal habitat trigger enzymatic antioxidant protection in the capitellid worm *Heteromastus filliformis*. *Mar. Ecol. Prog. Ser.*, **163**, 179–191.
- Abele-Oeschger,D. and Oeschger,R. (1995) Hypoxia-induced autoxidation of haemoglobin in the benthic invertebrates *Arenicola marina* (Polychaeta) and *Astarte borealis* (Bivalva) and the possible effects of sulphide. *J. Exp. Mar. Biol. Ecol.*, **187**, 63–80.
- Aebi,H. (1984) Catalase *in vitro*. *Meth. Enzymol.*, **105**, 121–126.
- Ålin,P., Danielson,U.H. and Mannervik,B. (1985) 4-Hydroxyalk-2-enals are substrates for glutathione transferase. *FEBS Lett.*, **179**, 267–270.
- Andley,U.P. and Clark,B.A. (1989) The effects of near-UV radiation on human lens β-crystallins: protein structural changes and the production of O<sub>2</sub>- and H<sub>2</sub>O<sub>2</sub>. *Photochem. Photobiol.*, **50**, 97–105.
- Barthelemy,L., Belaud,A. and Chastel,C. (1981) A comparative study of oxygen toxicity in vertebrates. *Resp. Physiol.*, **44**, 261–268.
- Bertling,C.J., Lin,F. and Girotti,A.W. (1996) Role of hydrogen peroxide in the cytotoxic effects of UVA/B radiation on mammalian cells. *Photochem. Photobiol.*, **64**, 137–142.
- Black,H.S. (1987) Potential involvement of free radical reactions in ultraviolet light-mediated cutaneous damage. *Photochem. Photobiol.*, **46**, 213–221.
- Bradford,M.M. (1976) A rapid and sensitive method for the quantitation of microgram quantities of protein utilizing the principle of protein-dye binding. *Analyt. Biochem.*, **72**, 248–254.
- Brehm,V. (1938) Die Rotfärbung von Hochgebirgsorganismen. *Biol. Rev.*, **13**, 307–318.
- Buchner,T., Abele-Oeschger,D. and Theede,H. (1996) Aspects of antioxidant status in the polychaete *Arenicola marina*: tissue and subcellular distribution, and reaction to environmental hydrogen peroxide and elevated temperatures. *Mar. Ecol. Prog. Ser.*, **143**, 141–150.
- Claiborne,A. (1985) Catalase activity. In Greenwald,R.A. (ed.), *Handbook of Methods for Oxygen Radical Research*. CRC Press, Boca Raton, pp. 283–284.
- Cooper,W.J., Shao,C., Lean,D.R.S., Gordon,A.S. and Scully,F.E., Jr (1994) Factors affecting the distribution of H<sub>2</sub>O<sub>2</sub> in surface waters. In Baker,L.A. (ed.), *Environmental Chemistry of Lakes and Reservoirs*. American Chemical Society, Washington, pp. 391–422.
- Fuchs,J. and Packer,L. (1991) Photooxidative stress in the skin. In Sies,H. (ed.), *Oxidative Stress: Oxidants and Antioxidants*. Academic Press, London, pp. 559–583.
- Fuchs,J., Hufflejt,M.E., Rothfuss,L.M., Wilson,D.S., Carcamo,G. and Packer,L. (1989) Impairment of enzymic and nonenzymic antioxidants in skin by UVB irradiation. *J. Invest. Dermatol.*, **93**, 769–773.
- Gil,P. and Barja de Quiroga,G. (1988) Effect of temperature acclimation on enzymatic activities and thermal sensitivity of catalase, oxygen consumption and concentration of tissue peroxidation products in *Discoglossus pictus* tadpoles. *Comp. Biochem. Physiol.*, **89B**, 363–373.
- Gil,P., Alonso-Bedate,M. and Barja de Quiroga,G. (1987) Different levels of hyperoxia reversibly induce catalase activity in amphibian tadpoles. *Free Radical Biol. Med.*, **3**, 137–146.
- Goss,L.B. and Bunting,D.L. (1980) Temperature effects on zooplankton respiration. *Comp. Biochem. Physiol.*, **66A**, 651–658.
- Graetzer,R. (1987) Oxygen effect in survival of *Dictyostelium discoideum* treated with near ultraviolet radiation. *Photochem. Photobiol.*, **45**, 425–427.
- Habig,W.H., Pabst,M.J. and Jakoby,W.B. (1974) Glutathione S-transferases. The first enzymatic step in mercapturic acid formation. *J. Biol. Chem.*, **249**, 7130–7139.
- Hairston,N.G., Jr (1979) The effect of temperature on carotenoid photoprotection in the copepod *Diaptomus nevadensis*. *Comp. Biochem. Physiol.*, **62A**, 445–448.

- Hebert,P.D.N. and Emery,C.J. (1990) The adaptive significance of cuticular pigmentation in *Daphnia*. *Functional Ecol.*, **4**, 703–710.
- Hessen,D.O. (1994) *Daphnia* responses to UV-light. *Arch. Hydrobiol. Beih. Ergebn. Limnol.*, **43**, 185–195.
- Hessen,D.O. (1996) Competitive trade-off strategies in Arctic *Daphnia* linked to melanism and UV-B stress. *Polar Biol.*, **16**, 573–579.
- Hessen,D.O. and Sørensen,K. (1990) Photoprotective pigmentation in alpine zooplankton populations. *Aqua Fennica*, **20**, 165–170.
- Hideg,E. and Vass,I. (1996) UV-B induced free radical production in plant leaves and isolated thylakoid membranes. *Plant Sci.*, **115**, 251–260.
- Hobæk,A. and Wolf,H.G. (1991) Ecological genetics of Norwegian *Daphnia*. II. Distribution of *Daphnia longispina* genotypes in relation to short-wave radiation and water colour. *Hydrobiologia*, **225**, 229–243.
- Jones,D.P. (1985) The role of oxygen concentration in oxidative stress: hypoxic and hyperoxic models. In Sies,H. (ed.), *Oxidative Stress*. Academic Press, London, pp. 151–195.
- Jones,J.D. (1961) Aspects of respiration in *Planorbis corneus* L. and *Lymnaea stagnalis* L. (Gastropoda: Pulmonata). *Comp. Biochem. Physiol.*, **4**, 1–29.
- Kerb,R., Brockmüller,J., Reum,T. and Roots,I. (1997) Deficiency of glutathione S-transferases T1 and M1 as heritable factors of increased cutaneous UV sensitivity. *J. Invest. Dermatol.*, **108**, 229–232.
- Ketterer,B. and Meyer,D.J. (1989) Glutathione transferases: a possible role in the detoxication and repair of DNA and lipid hydroperoxides. *Mutat. Res.*, **214**, 33–40.
- Kobayashi,M. and Hoshi,T. (1984) Analysis of respiratory role of haemoglobin in *Daphnia magna*. *Zool. Sci.*, **1**, 523–532.
- Kobayashi,M. and Tanaka,Y. (1991) Oxygen-transporting function of hemoglobin in *Daphnia magna*. *Can. J. Zool.*, **69**, 2968–2972.
- Kobayashi,M., Fujiki,M. and Suzuki,T. (1988) Variation in and oxygen-binding properties of *Daphnia magna* hemoglobin. *Physiol. Zool.*, **61**, 415–419.
- Korpelainen,H. (1986) The effects of temperature and photoperiod on life history parameters of *Daphnia magna* (Crustacea: Cladocera). *Freshwater Biol.*, **16**, 615–620.
- MacArthur,J.W. and Baillie,W.H.T. (1929) Metabolic activity and duration of life. I. Influence of temperature on longevity in *Daphnia magna*. *J. Exp. Zool.*, **53**, 221–242.
- Masaki,H., Atsumi,T. and Sakurai,H. (1995) Detection of hydrogen peroxide and hydroxyl radicals in murine skin fibroblasts under UVB irradiation. *Biochem. Biophys. Res. Commun.*, **206**, 474–479.
- McKee,D. (1995) Long-term temperature acclimation in *Daphnia magna*: effects on filtering rates. *J. Plankton Res.*, **17**, 1095–1103.
- Merker,E. (1940) Der Lichtschutz in belebtem Wasser. *Int. Rev. Ges. Hydrobiol.*, **40**, 174–196.
- Møller,V., Forbes,V.E. and Depledge,M.H. (1994) Influence of acclimation and exposure temperature on the acute toxicity of cadmium to the freshwater snail *Potamopyrgus antipodarum* (Hydrobiidae). *Environ. Toxicol. Chem.*, **13**, 1519–1524.
- Morichetti,E., Cundari,E., Del Carratore,R. and Bronzetti,G. (1989) Induction of cytochrome P-450 and catalase activity in *Saccharomyces cerevisiae* by UV and X-ray irradiation. Possible role for cytochrome P-450 in cell protection against oxidative damage. *Yeast*, **5**, 141–148.
- Morris,S. and Taylor,A.C. (1985) The respiratory response of the intertidal prawn *Palaemon elegans* (Rathke) to hypoxia and hyperoxia. *Comp. Biochem. Physiol.*, **81A**, 633–639.
- Nakano,H., Kimura,J., Kumano,T., Hanada,K., Satoh,K., Hashimoto,I. and Tsuchida,S. (1997) Decrease in class pi glutathione transferase mRNA levels by ultraviolet irradiation of cultured rat keratinocytes. *Jpn J. Cancer Res.*, **88**, 1063–1069.
- OECD (1996) *Daphnia magna* reproduction test. OECD Guidelines for Testing of Chemicals No. 202.
- Pannunzio,T.M. and Storey,K.B. (1998) Antioxidant defenses and lipid peroxidation during anoxia stress and aerobic recovery in the marine gastropod *Littorina littorea*. *J. Exp. Mar. Biol. Ecol.*, **221**, 277–292.
- Paul,R.J., Colmorgen,M., Hüller,S., Tyroller,F. and Zinkler,D. (1997) Circulation and respiratory control in millimetre-sized animals (*Daphnia magna*, *Folsomia candida*) studied by optical methods. *J. Comp. Physiol. B*, **167**, 399–408.
- Persoone,G., Van de Vel,A., Van Steertegem,M. and De Nayer,B. (1989) Predictive value of laboratory tests with aquatic invertebrates: influence of experimental conditions. *Aquat. Toxicol.*, **14**, 149–166.
- Punnonen,K., Lehtola,K., Autio,P., Kiistala,U. and Ahotupa,M. (1995) Chronic UVB irradiation induces superoxide dismutase activity in human epidermis *in vivo*. *J. Photochem. Photobiol. B*, **30**, 43–48.



- Radi, A.A.R., Matkovics, B. and Csengeri, I. (1988) Effects of various oxygen concentrations on antioxidant enzymes and the quantity of tissue phospholipid fatty acids in the carp. *Acta Biol. Hung.*, **39**, 109–119.
- Regoli, F., Principato, G.B., Bertoli, E., Nigro, M. and Orlando, E. (1997) Biochemical characterization of the antioxidant system in the scallop *Adamussium colbecki*, a sentinel organism for monitoring the Antarctic environment. *Polar Biol.*, **17**, 251–258.
- Roos, J.C. and Vincent, W.F. (1998) Temperature dependence of UV radiation effects on Antarctic cyanobacteria. *J. Phycol.*, **34**, 118–125.
- Rushmore, T.H., Morton, M.R. and Pickett, C.B. (1991) The antioxidant responsive element. Activation by oxidative stress and identification of the DNA consensus sequence required for functional activity. *J. Biol. Chem.*, **266**, 11632–11639.
- Schaefer, E.D. and Pipes, W.O. (1973) Temperature and the toxicity of chromate and arsenate to the rotifer, *Philodina roseola*. *Water Res.*, **7**, 1781–1790.
- Shindo, Y. and Hashimoto, T. (1995) Antioxidant defence mechanism of the skin against UV irradiation: study of the role of catalase using acatalasaemia fibroblasts. *Arch. Dermatol. Res.*, **287**, 747–753.
- Shindo, Y., Witt, E., Han, D. and Packer, L. (1994) Dose-response effects of acute ultraviolet irradiation on antioxidants and molecular markers of oxidation in murine epidermis and dermis. *J. Invest. Dermatol.*, **102**, 470–475.
- Siebeck, O. (1978) Ultraviolet tolerance of planktonic crustaceans. *Verh. Int. Ver. Limnol.*, **20**, 2469–2473.
- Siebeck, O. and Böhm, U. (1991) UV-B effects on aquatic animals. *Verh. Int. Ver. Limnol.*, **24**, 2773–2777.
- Sinha, N.P. and Dejours, P. (1980) Ventilation and blood acid-base balance of the crayfish as functions of water oxygenation (40–1500 Torr). *Comp. Biochem. Physiol.*, **65A**, 427–432.
- Sprague, J.B. (1985) Factors that modify toxicity. In Rand, G.M. and Petrocelli, S.R. (eds), *Fundamentals of Aquatic Toxicology*. Taylor & Francis, London, pp. 124–163.
- Wang, P. and Schellhorn, H.E. (1995) Induction of resistance to hydrogen peroxide and radiation in *Deinococcus radiodurans*. *Can. J. Microbiol.*, **41**, 170–176.
- Zigman, S., Reddan, J., Schultz, J.B. and McDaniel, T. (1996) Structural and functional changes in catalase induced by near-UV radiation. *Photochem. Photobiol.*, **63**, 818–824.

Received on February 24, 1999; accepted on December 20, 1999
